1 **Title:** Clinical and genomic epidemiology of *mcr-9*-carrying carbapenem-resistant  
2 Enterobacterales isolates in Metropolitan Atlanta, 2012-2017

3  
4 **Authors:** Ahmed Babiker<sup>1,2</sup>, Chris Bower<sup>3-5</sup>, Joseph D. Lutgring<sup>6</sup>, Jessica Howard-  
5 Anderson<sup>1</sup>, Uzma Ansari<sup>6</sup>, Gillian McAllister<sup>6</sup>, Michelle Adamczyk<sup>6,7</sup>, Erin Breaker<sup>6</sup>,  
6 Sarah W. Satola<sup>1,2,3</sup>, Jesse T. Jacob<sup>1,3</sup>, Michael H. Woodworth<sup>1,3</sup>

7  
8 **Affiliations:**

9  
10 1- Division of Infectious Diseases, Department of Medicine, Emory University School of  
11 Medicine, Atlanta, GA

12  
13 2- Department of Pathology and Laboratory Medicine, Emory University School of  
14 Medicine, Atlanta, GA

15  
16 3- Georgia Emerging Infections Program, Decatur, GA

17  
18 4- Atlanta VA Medical Center, Decatur, GA

19  
20 5- Foundation for Atlanta Veterans Education and Research, Decatur, GA

21  
22 6- Division of Healthcare Quality Promotion, Centers for Disease Control and  
23 Prevention, Atlanta, Georgia, USA

24

25 7- Goldbelt C6, LLC, Chesapeake, Virginia, USA

26

27 **Running title:** Genomic epidemiology of mcr-9

28

29 **Key words:** healthcare epidemiology, next generation sequencing, CRE, MDR, AMR

30

31 **Corresponding Author:** Michael H. Woodworth, Division of Infectious Diseases,

32 Department of Medicine, Emory University School of Medicine, Atlanta, GA, USA.

33 Email: [michael.holmes.woodworth@emory.edu](mailto:michael.holmes.woodworth@emory.edu)

34

35 **Alternative Corresponding author:** Ahmed Babiker, Division of Infectious Diseases,

36 Department of Medicine, Emory University School of Medicine, Atlanta, GA, USA.

37 Email: [ahmed.babiker@emory.edu](mailto:ahmed.babiker@emory.edu)

38 **Abstract (Word limit: 250, word count: 250)**

39 Colistin is a last-resort antibiotic for multidrug-resistant gram-negative infections.  
40 Recently, the ninth allele of the mobile colistin resistance (*mcr*) gene family, designated  
41 *mcr-9*, was reported. However, its clinical and public health significance remains  
42 unclear. We queried genomes of carbapenem-resistant Enterobacterales (CRE) for  
43 *mcr-9* from a convenience sample of clinical isolates collected between 2012-2017  
44 through the Georgia Emerging Infections Program, a population- and laboratory-based  
45 surveillance program. Isolates underwent phenotypic characterization and whole  
46 genome sequencing. Phenotypic characteristics, genomic features, and clinical  
47 outcomes of *mcr-9* positive and negative CRE cases were then compared. Among 235  
48 sequenced CRE genomes, thirteen (6%) were found to harbor *mcr-9*, all of which were  
49 *Enterobacter cloacae* complex. The median MIC, rates of heteroresistance and  
50 inducible resistance to colistin were similar between *mcr-9* positive and negative  
51 isolates. However, rates of resistance were higher among *mcr-9* positive isolates across  
52 most antibiotic classes. All cases had significant healthcare exposures. The 90-day  
53 mortality was similarly high in both *mcr-9* positive (31%) and negative (7%) CRE cases.  
54 Nucleotide identity and phylogenetic analysis did not reveal geo-temporal clustering.  
55 *mcr-9* positive isolates had a significantly higher number of median [range] AMR genes  
56 (16 [4-22] vs. 6 [2-15];  $p < 0.001$ ) compared to *mcr-9* negative isolates. Pan genome  
57 tests confirmed a significant association of *mcr-9* detection with mobile genetic element  
58 and heavy metal resistance genes. Overall, the presence of *mcr-9* was not associated  
59 with significant changes in colistin resistance or clinical outcomes but continued  
60 genomic surveillance to monitor for emergence of AMR genes is warranted.

61

## 62 **Introduction**

63

64 With the rise of carbapenem-resistant organisms over the past few decades (1, 2),  
65 polymyxins (colistin or polymyxin B) remain last-resort antibiotics for multidrug-resistant  
66 gram-negative infections (3). While concerns regarding efficacy and nephrotoxicity (4)  
67 have relegated polymyxins to the second or third line of the antibiotic armamentarium  
68 (5), these agents remain listed as critically important antibiotics by the WHO and are  
69 widely used globally.

70

71 In 2015, a colistin-resistance gene localized on a plasmid was designated mobilized  
72 colistin resistance-1 (*mcr-1*) (6). The *mcr-1* gene encodes a transferase that adds a  
73 phosphoethanolamine residue to cell membrane lipid A, altering the binding site of  
74 colistin, and consequently leading to colistin resistance (6). Since its initial description in  
75 *Escherichia coli* (6), multiple *mcr* alleles (*mcr-2* to *mcr-10.1*) have been described (7).  
76 The *mcr-9* allele was reported in 2019 and is most similar to *mcr-3* among previously  
77 described *mcr* alleles (8). A recent search of publicly-available sequence databases  
78 revealed a wide global distribution of *mcr-9*-harboring isolates, across six continents  
79 and in at least 9 *Enterobacterales* species (7, 9). However, it is most commonly  
80 detected among *Enterobacter* species (9).

81

82 In the US, the initial wave of carbapenem-resistant Enterobacterales (CRE) was  
83 predominantly driven by proliferation of KPC-harboring *Klebsiella pneumoniae* (1, 10);

84 however, as demonstrated in recent reports, a second wave of CRE in the US seems to  
85 be driven by the rise of *Enterobacter* species (1, 11). Genomic analysis indicates this  
86 second wave is associated with a high degree of clonal diversity among isolates (12).  
87 With the increasing spread of carbapenem-resistant *Enterobacter*, the dissemination of  
88 *mcr-9* is highly probable. Despite its global distribution, the impact of *mcr-9* on colistin  
89 phenotypic susceptibility remain unclear. Moreover, its association with patient clinical  
90 outcomes or potential for outbreaks of public health concern is yet to be examined.

91  
92 The Centers for Disease Control and Prevention (CDC)-funded Georgia Emerging  
93 Infections Program (GA EIP) performs active, population- and laboratory- based  
94 surveillance for CRE isolated from sterile sites or urine in metropolitan Atlanta, GA  
95 (population ~4 million). We aimed to estimate the frequency of *mcr-9* among CRE cases  
96 within the GA EIP catchment area and to compare clinical outcomes and  
97 microbiological, genomic, and clinical characteristics of *mcr-9* positive and *mcr-9*  
98 negative cases.

99

## 100 **Results**

101

102 *The mcr-9 allele was infrequently detected among GA EIP isolates between 2012-2017*

103

104 Between 2012-2017, the GA EIP identified 1,507 incident CRE cases, 716 (47.5%)  
105 were *K. pneumoniae*; 415 (27.5%), *Escherichia coli*; 270 (17.9%), *Enterobacter cloacae*  
106 complex; 72 (4.8%), *Klebsiella aerogenes* (formerly *Enterobacter*); and 34 (2.3%)

107 *Klebsiella oxytoca* cases. The overall crude annual CRE incidence across GA EIP  
108 increased from 4.6 to 9.6 per 100,000 population from 2012 to 2017. Carbapenem-  
109 resistant *E. cloacae* complex incidence, in particular, increased from 0.37 to 2.3 per  
110 100,000 population during the study period. This increase coincided with revision of the  
111 CDC case surveillance definition for CRE (13). (**Figure 1 A/B, Supplementary Table 1,**  
112 **Supplementary Figure 1**).

113  
114 A convenience sample of 384 isolates which met the GA EIP CRE case definition was  
115 sent to the CDC for further characterization. Of the 384, 235 (61%) underwent whole  
116 genome sequencing (WGS). Among 235 sequenced CRE isolates, thirteen (6%) were  
117 found to harbor *mcr-9*, all of which were *E. cloacae* complex. All remaining sequenced  
118 *mcr-9* negative *E. cloacae* complex (n=14) were included as a comparative group,  
119 yielding a total number of 27 *E. cloacae* complex isolates.

## 120 121 *Microbiology Characteristics*

122  
123 Following collection, isolates underwent reference antimicrobial susceptibility testing by  
124 broth microdilution (BMD) at CDC. Of the *E. cloacae* complex isolates that underwent  
125 WGS from 2012-2017, twenty-two isolates (81.7%, 22/27) were confirmed to be  
126 carbapenem-resistant. Carbapenem resistance was similar among *mcr-9* positive and  
127 negative cases (84.6% (11/13) vs. 78.6% (11/14);  $p=1.00$ ). Fluoroquinolone resistance  
128 was significantly higher among *mcr-9* positive isolates compared to *mcr-9* negative  
129 isolates (100% (13/13) vs. 57.1% (8/14);  $p=0.03$ ). This contributed to a higher proportion

130 of isolates being classified as difficult-to-treat resistance (DTR) (14). Overall, 48.1%  
131 (13/27) were classified as harboring DTR (14, 15). with *mcr-9* isolates having higher-  
132 rates of DTR (61.5% (8/13) vs. 35.7% (5/14)  $p=0.34$ ). Similarly, rates of aminoglycoside,  
133 tetracycline, and trimethoprim-sulfamethoxazole resistance were higher among *mcr-9*  
134 positive isolates compared to *mcr-9* negative isolates (**Supplementary Table 2**).

135  
136 The median [range of concentrations tested] colistin MIC for all *E. cloacae* complex  
137 isolates was 0.5  $\mu\text{g/mL}$  [ $\leq 0.25$ ->8.0]. Proportions of resistance, heteroresistance and  
138 inducible resistance were 11.1% (3/27), 48.1% (13/27) and 14.8% (4/27), respectively.  
139 There was no significant difference in colistin MIC, heteroresistance or inducible  
140 resistance between *mcr-9* positive and negative isolates (**Table 1**). Of the three *E.*  
141 *cloacae* complex isolates which were colistin-resistant by BMD, none were *mcr-9*  
142 positive, although one was positive for *mcr-10.1*.

143  
144 *Clinical characteristics of mcr-9 positive and negative CRE cases.*

145  
146 *E. cloacae* complex isolates were commonly isolated from urine (88.9%, 24/27),  
147 followed by blood (7.4%, 2/27) and peritoneal fluid (3.7%, 1/27). All cases had  
148 significant healthcare exposures, with 14 cases (51.9%) long term care facility onset, 10  
149 (37.0%) healthcare-associated community onset, and 3 (11.1%) hospital onset. Ten  
150 patients (37.0%) were hospitalized at time of culture or within 29 days of CRE culture.  
151 Among the 10 hospitalized patients, 3 (30.0%) patients were admitted to the ICU within  
152 seven days of culture and one patient died during the period of hospitalization (10.0%).

153 Among hospitalized patients with available follow up data (n=7), 42.8% (3/7) were  
154 readmitted within 30 days. Overall unadjusted all-cause 90-day mortality was 18.5%  
155 (5/27). No clinical characteristics and outcomes were significantly different, and most  
156 were numerically similar among *mcr-9* positive and negative cases. 90-day mortality  
157 was higher among *mcr-9* positive cases (30.7% (4/13) vs. 7.1% (1/14)) compared to  
158 *mcr-9* negative cases but this was not statistically significant ( $p=0.28$ ).

159

### 160 *Genomic Analysis*

161

162 To expand the analytic genome set, a comparator cohort of nine publicly-available  
163 clinical and environmental carbapenem-resistant *E. cloacae* complex (three *mcr-9*  
164 positive, six *mcr-9* negative) genomes downloaded from National Center for  
165 Biotechnology Information (NCBI). Review of associated metadata revealed isolates to  
166 have been collected between January 2012 and December 2016 at the National  
167 Institutes of Health (NIH) clinical center (Bethesda, MD) (PRJNA430442) (16). These  
168 genomes were combined with the 27 GA EIP isolates, resulting in 36 isolate draft  
169 genomes included in further comparative genomic analyses.

170

171 The 13 *mcr-9* positive *E. cloacae* complex isolates were obtained from 10 distinct GA  
172 EIP facilities across the study period (2012-2017). Average nucleotide identity pairwise  
173 comparisons revealed three distinct clusters (**Figure 2**). This clustering did appear to be  
174 related to geographical location or year of isolation. NIH isolates clustered with GA EIP  
175 isolates, and GA EIP isolates did not cluster by facility or year (**Supplementary Figure**



176 2). Their distribution throughout the genome phylogeny suggested that the *mcr-9*  
177 positive isolates were largely genetically distinct from one another.  
178  
179 Median [range] AMR gene content (excluding *mcr-9*) was significantly higher among  
180 *mcr-9* positive isolates compared to *mcr-9* negative isolates (16 [4-22] vs. 6 [2-15]; p  
181 <0.001) (**Figure 3**). Among the three isolates with elevated colistin MICs, no point  
182 mutations in *pmrA/pmrB*, a two-component system regulator of lipopolysaccharide (the  
183 target site of colistin) modifications, were detected. Pan-genome-wide association tests  
184 revealed a significant association of *mcr-9* detection with the detection of mobile genetic  
185 element (MGE)-associated genes such as *repB*, *parM*, *hns2*; heavy metal resistance  
186 (HMR) genes such as *arsC2*, *arsB2*, *fieF2*, *pcoE2* and *merA*; and virulence genes such  
187 *hipA* (**Table 2, Supplementary Table 2, Supplementary Figure 3**). Taken together,  
188 these comparative genomic analyses across two sites with *mcr-9* positive *E. cloacae*  
189 complex isolate draft genomes confirmed the colocalization of *mcr-9* with plasmid-  
190 mobilized heavy metal resistance genes but did not provide evidence of a high-identity  
191 outbreak cluster in space or time.

192

## 193 Discussion

194

195 Among 235 CRE isolates collected through a comprehensive, population-based  
196 surveillance program targeting the most common CRE species, we found a low  
197 prevalence of *mcr-9*, all of which were detected in *Enterobacter cloacae* isolates. Our  
198 phylogenetic analyses revealed a genetically diverse *mcr-9* positive CRE population,

199 suggesting sporadic carriage rather than clonal spread. Using multi-modal phenotypic  
200 testing, we were unable to detect impacts of *mcr-9* on colistin susceptibility, however  
201 genomic analysis revealed an association with increased AMR, HMR and virulence  
202 genes. In addition, our *mcr-9*-containing CRE isolates were exclusively acquired in  
203 healthcare settings, with a trend towards increased mortality. Since their initial  
204 description, recognition of *mcr* genes associated with colistin resistance has spread  
205 rapidly across the globe (7). Our study of *mcr-9*-harboring CRE cases provides unique  
206 insights into the phenotypic and genomic implications of *mcr-9*, and is one of the first to  
207 examine clinical outcomes.

208  
209 Whether *mcr-9* confers colistin resistance has been debated (17). The first isolate  
210 identified to harbor *mcr-9* was also susceptible to colistin but the allele was found to  
211 confer resistance to colistin when cloned into a colistin-susceptible *E. coli* and  
212 expressed under the control of an IPTG-induced promoter. However, this was only at 1,  
213 2, and 2.5 mg/L, but not at 5 mg/L of colistin (8). Kieffer *et al.* later reported that *mcr-9*  
214 expression was inducible in the presence of colistin when located upstream of the two-  
215 component sensor kinase system *qseBC* (17). This two-component signaling network  
216 allows bacteria to sense and respond to their changing environments. In particular, the  
217 *qseC* and *qseB* genes encode a histidine kinase sensor (*qseC*) and its cognate partner  
218 (*qseB*). The *qseBC* system has been shown to interact with *pmrA/pmrB*, to induce  
219 resistance to the colistin(18). However, a study of *mcr-9*-containing isolates from retail  
220 meat conducted by the National Antimicrobial Resistance Monitoring System (NARMS),  
221 found all 105 isolates (99 *S. enterica* and 6 *E. coli*) tested to be susceptible to colistin,

222 including 10 isolates with *qseBC* (19), indicating that the previously demonstrated  
223 impact of *qseBC* on *mcr-9* expression and colistin resistance may be dependent on  
224 strain backgrounds, as originally demonstrated in *E. coli* (17). Among clinical CRE  
225 isolates, we found the presence of *mcr-9* was not associated with frank or inducible  
226 colistin resistance. Furthermore, our study is the first to examine the association of *mcr-*  
227 *9* with heteroresistance. Heteroresistance is a largely unrecognized form of antibiotic  
228 resistance where only a subset of cells within a bacterial population are resistant to a  
229 given drug (20). These resistant cells can be selected for in the presence of the  
230 antibiotic and cause colistin treatment failures *in-vivo* (21). In a multisite surveillance  
231 study of colistin heteroresistance among CRE, *Enterobacter spp.* and in particular *E.*  
232 *cloacae*, displayed the highest proportion of colistin heteroresistance (22). However,  
233 here we found no association between *mcr-9* and colistin heteroresistance.

234  
235 Carbapenem-resistant gram-negatives are a public health threat broadly prioritized by  
236 public health organizations (23). Given the limited therapeutic options, morbidity and  
237 mortality rates are increased disproportionately when compared to infections caused by  
238 susceptible bacteria. We observed high 90-day mortality rates, but these were similar to  
239 reported CRE mortality rates at other US academic centers (1). However, there was a  
240 non-significant trend for higher mortality among *mcr-9* positive isolates. This association  
241 should be further evaluated in larger studies, with adjustment for potentially-confounding  
242 variables associated with mortality such as severity of illness, age and comorbidities as  
243 our small size may underestimate differences in mortality (1). This finding may be  
244 related to the increase in phenotypic resistance and AMR gene content associated with

245 *mcr-9*. A similar finding was previously reported describing 1,035 *mcr-9*-containing  
246 isolates in which 97% (1003/1035) were classified as MDR (7). This increased AMR  
247 gene content, renders isolates not only carbapenem-resistant, but also with DTR,  
248 further limiting therapeutic options (14). DTR is a clinically relevant and functional  
249 classification of resistance which signifies *in vitro* resistance to all high-efficacy, low-  
250 toxicity (or first-line) agents and is associated with worse clinical outcomes when  
251 compared to carbapenem-resistant phenotypes (14). Moreover, genome-wide  
252 association studies, revealed a difference in key virulence genes such *hipA*, a  
253 eukaryote-like serine threonine kinase that inhibits cell growth and induces bacterial  
254 persistence (24).

255  
256 We found the presence of *mcr-9* to be associated with HMR genes such *arsA*, *merA*,  
257 conferring arsenic and mercury resistance, respectively. There has been increasing  
258 evidence for the co-selection of AMR and HMR genes through either co-resistance or  
259 cross-resistance (25). Co-resistance occurs when AMR and HMR genes are carried on  
260 the same mobile genetic element. IncH12 plasmids, which frequently harbor HMR  
261 genes (8), have been found to be the predominant replicon type carrying *mcr-9* and  
262 frequently demonstrated in our isolates. Hospital wastewater is an increasingly  
263 recognized reservoir for resistant gram-negative organisms that cause healthcare-  
264 associated infections (26) and HMR genes may allow for continued persistence in the  
265 environment (27). While the community setting is starting to represent an increased  
266 source of multidrug-resistant infections (28), the healthcare setting still represents a  
267 major risk for MDR acquisition, as was seen among our cohort.

268

269 Our study combines detailed epidemiological, clinical, phenotypic, and genomic data to  
270 examine the significance of *mcr-9* but has some limitations. Firstly, we could not do a  
271 full interrogation of *mcr-9*-containing plasmids, due to limitations of short read  
272 sequencing. However, prior studies have significantly characterized the genomic  
273 background of *mcr-9*-containing plasmids (9). Second, our study did not include  
274 *Salmonella* species which are a major reservoir for *mcr-9* or other *Enterobacterales*  
275 species such as *Citrobacter* (7) , and our findings may not be generalizable to these  
276 species. However, our dataset of 235 includes the most common and significant clinical  
277 CRE species (1, 23) and is one of few studies carried out on clinical human isolates  
278 (19). Third, while we assessed for presence of the *pmrA/pmrB* regulatory system (29),  
279 we did not include assessment of the two-component system *qseBC* (8) or testing  
280 conditions (such as the use of cation-adjusted Mueller-Hinton broth) (30) which have  
281 been shown to influence *mcr-9* expression and the colistin MIC results, respectively.  
282 Fourth, while our overall cohort is from a population-based surveillance program, the  
283 collected and sequenced isolates represent a convenience sample which may limit  
284 generalizability and our sample size was not powered to detect clinical outcomes.

285

286 In conclusion, *mcr-9* may not have actionable public health implications as other *mcr*  
287 alleles, most of which consistently display colistin resistance. However, given the  
288 increased AMR and HMR gene content, continued genomic surveillance of multidrug-  
289 resistant organisms to monitor for the emergence of AMR genes such as *mcr-9* is

290 prudent. Especially as changes in the up or downstream genetic context or the  
291 accumulation of mutations may impact its ability to confer colistin resistance.

292

## 293 **Methods**

294

295 CRE cases were identified by routine queries on automated testing instruments in the  
296 clinical labs that serve residents of the GA EIP catchment area. Clinical characteristics  
297 were obtained through medical record review, all-cause mortality data was obtained  
298 through the Georgia Vital Statistics records, and hospital readmission data was  
299 obtained through the Department of Public Health's hospital discharge datasets.

300 Georgia EIP surveillance activities are reviewed and approved by the Emory University  
301 Institutional Review Board.

302

303 From 2012-2015, a CRE case was defined as an isolate of *E. coli*, *E. cloacae*  
304 complex, *K. (formally Enterobacter) aerogenes*, *K. pneumoniae*, or *K. oxytoca* collected  
305 from a normally sterile body site (e.g., bloodstream) or urine that tested non-susceptible  
306 to  $\geq 1$  carbapenem (imipenem, meropenem, or doripenem) and resistant to all 3<sup>rd</sup>  
307 generation cephalosporins tested (ceftriaxone, ceftazidime, and cefotaxime) by testing  
308 performed at the local collection microbiology laboratory. Beginning in 2016, the  
309 phenotypic case definition was changed to resistance to  $\geq 1$  carbapenem (now including  
310 ertapenem) with no cephalosporin parameter. Antibiotic susceptibility interpretations  
311 were determined using the current Clinical and Laboratory Standards Institute  
312 breakpoints (31). Fluoroquinolone resistance was defined as non-susceptibility

313 (intermediate or resistant) to  $\geq 1$  fluoroquinolone. DTR was defined as intermediate or  
314 resistant to all reported agents in carbapenem,  $\beta$ -lactam, and fluoroquinolone categories  
315 (14, 15).

316  
317 An incident CRE case was defined as the first CRE isolate from a patient during a 30-  
318 day period that met the surveillance definition. All incident CRE cases underwent  
319 medical record review using a standardized abstraction form. Both inpatient and  
320 outpatient medical records were reviewed for patient demographics, underlying clinical  
321 comorbidities, location of culture collection, specimen source, associated infectious  
322 syndromes, relevant health care exposures and patient outcomes. 90-day mortality was  
323 determined based by matching to vital records.

324  
325 A convenience sample of CRE isolates are collected annually and submitted to the CDC  
326 for further characterization. Isolates that are collected and matched to an incident case  
327 with a completed case report form are eligible for shipment. All isolates undergo repeat  
328 reference BMD at the CDC followed by whole genome sequencing using an Illumina  
329 MiSeq benchtop sequencer.

330  
331 All *mcr-9* positive and a comparative control group of *mcr-9* negative *E. cloacae*  
332 complex isolates underwent additional population analysis profiling and inducible  
333 resistance testing at the Emory Investigational Clinical Microbiology Core as previously  
334 described (20). Briefly, all isolates were tested via the population analysis profile (PAP)  
335 method. This consists of plating overnight cultures of each isolate onto solid Muller-

336 Hinton (MH) agar with or without colistin concentrations of 0.5, 1, 2, 4, 16, 32, and 100  
337 µg/ml. Surviving colonies were enumerated and used to detect colistin-resistant  
338 subpopulations characteristic of heteroresistance (20). Inducible resistance testing was  
339 performed as previously described (32). Briefly, a single colony of each clinical isolate  
340 was grown in Muller-Hinton (MH) broth overnight at 37°C, and cultures were diluted  
341 1:100 in MH broth containing serially increasing concentrations of colistin, starting at the  
342 one-half MIC value of the respective isolate, and doubling every 24 hours until bacterial  
343 growth was completely inhibited (with no bacteria growth after spreading 100 µL of the  
344 culture on MH agar plates supplemented with corresponding concentration of colistin).  
345 The concentration of colistin at which bacterial growth was completely inhibited was  
346 recorded as the final colistin concentration.

347

#### 348 *Bioinformatic Methods*

349

350 Fastq files of *Enterobacter cloacae* complex isolates of interest were downloaded from  
351 the Sequence Read Archive (SRA) repository maintained by the National Center for  
352 Biotechnology Information (NCBI) using the fasterq-dump tool from the SRA Toolkit V.  
353 2.5.7 (<http://ncbi.github.io/sra-tools/>). Illumina reads were quality filtered using  
354 Trimmomatic (33) and assembled *de novo* using SPAdes v3.13 (34). Pairwise  
355 comparisons of average nucleotide identity on the assembled genomes were performed  
356 with the Mashmap method using fastANI v1.32 (35). Gene sequences were predicted  
357 with Prodigal v2.6.3 (36) and annotated with Prokka v1.14.6 (37). Antimicrobial  
358 resistance and virulence gene content was assessed using AMRFinder Plus (38).



359 Presence of plasmids and point mutations in housekeeping genes associated with  
360 colistin resistance were assessed using the ResFinder and PlasmidFinder web interface  
361 with default settings and the *E. coli* database (39, 40). AMR gene presence/absence  
362 heatmaps were created using the package pheatmap on R version 4.0.2 (Vienna,  
363 Austria) and the RStudio interface version 1.3.1073 (Boston, MA, USA). Core genes  
364 were defined using Roary v3.13 (41). A phylogenetic tree based on a core gene  
365 alignment containing 1942 genes was generated using IQtree v2.0.3 (42). A maximum  
366 likelihood tree was generated by running 1,000 bootstrap replicates under the  
367 generalized time-reversible model of evolution. The tree was visualized and annotated  
368 using Interactive Tree of Life (iTOL) v4 (43). Pan-genome wide comparison of core  
369 genomes of *mcr-9* positive to *mcr-9* negative genomes was completed using scoary  
370 (44).

371

### 372 *Statistical analysis*

373

374 Annual incidence rates for CRE cases were calculated using the annual US census  
375 estimates of the surveillance area population as the denominator. Descriptive analyses  
376 were performed to summarize specimen information, health care exposures, outcomes,  
377 and microbiological results of incident cases;  $\chi^2$  and Wilcoxon rank sum tests were  
378 used to compare groups when applicable. Gene differences were assessed by a *p*-  
379 value adjusted with Bonferroni's method for multiple comparisons correction. Statistical  
380 analysis was performed using R version 4.0.2 (Vienna, Austria) and the RStudio

381 interface version 1.3.1073 (Boston, MA, USA). A 2-sided P value of <.05 was  
382 considered statistically significant.

383

### 384 **Funding**

385

386 EIP Surveillance of the Multi-site Gram-Negative Surveillance Initiative (MuGSI) was  
387 funded through the Centers for Disease Control and Prevention's Emerging Infections  
388 Program [U50CK000485].

389

390

### 391 **Acknowledgments**

392

393 We would like to thank the EIP and MuGSI staff and the CDC laboratory staff for their  
394 dedication and work to collect, validate, clean, and maintain the data used in this  
395 analysis. We would like to thank Alison Laufer Halpin for supervising the sequencing  
396 efforts of these isolates.

397

398

399 **Table 1: Carbapenem-resistant *E. cloacae* complex clinical and microbiological**  
 400 **characteristics**  
 401

|                                           | <b>All (N=27)</b><br>n (%) | <b><i>mcr-9</i> positive</b><br><b>(N=13)</b><br>n (%) | <b><i>mcr-9</i> negative *</b><br><b>(N=14)</b><br>n (%) | <b><i>p</i> value</b> |
|-------------------------------------------|----------------------------|--------------------------------------------------------|----------------------------------------------------------|-----------------------|
| <b>Culture Source</b>                     |                            |                                                        |                                                          | <b>0.33</b>           |
| Urine                                     | 24 (88.9)                  | 12 (92.3)                                              | 12 (85.7)                                                |                       |
| Blood                                     | 2 (7.4)                    | 1 (7.7)                                                | 1 (7.1)                                                  |                       |
| Peritoneal Fluid                          | 1 (3.7)                    | 0 (0.0)                                                | 1 (7.1)                                                  |                       |
| <b>Year</b>                               |                            |                                                        |                                                          | <b>0.62</b>           |
| 2012                                      | 1 (3.7)                    | 1 (7.7)                                                | 0 (0.0)                                                  |                       |
| 2013                                      | 8 (29.6)                   | 2 (15.4)                                               | 6 (42.9)                                                 |                       |
| 2014                                      | 2 (7.4)                    | 1 (7.7)                                                | 1 (7.1)                                                  |                       |
| 2015                                      | 3 (11.1)                   | 3 (23.1)                                               | 0 (0.0)                                                  |                       |
| 2016                                      | 9 (33.3)                   | 4 (30.8)                                               | 5 (35.7)                                                 |                       |
| 2017                                      | 4 (14.9)                   | 2 (15.4)                                               | 2 (14.3)                                                 |                       |
| <b>Infection Onset</b>                    |                            |                                                        |                                                          | <b>0.71</b>           |
| Hospital Onset                            | 3 (11.1)                   | 2 (15.4)                                               | 1 (7.1)                                                  |                       |
| Healthcare Associated-<br>Community Onset | 10 (37.0)                  | 4 (30.8)                                               | 6 (42.9)                                                 |                       |
| Long Term Care Facility Onset             | 14 (51.9)                  | 7 (53.8)                                               | 7 (50.0)                                                 |                       |

**Microbiology Characteristics**

|                                              |                   |                   |                   |      |
|----------------------------------------------|-------------------|-------------------|-------------------|------|
| Colistin MIC (median[range])**               | 0.5 [<0.25 ->0.8] | 0.5 [<0.25 -1.00] | 0.5 [<0.25 ->8.0] | 0.11 |
| Resistant                                    | 3 (11.1)          | 0                 | 3 (21.4)          | 0.25 |
| Heteroresistant                              | 13 (48.1)         | 5 (38.5)          | 8 (57.1)          | 0.56 |
| Inducible resistance                         | 4 (14.8)          | 2 (15.4)          | 2 (14.3)          | 1.00 |
| Difficult-to-Treat Resistance                | 13 (48.1)         | 8 (61.5)          | 5 (35.7)          | 0.34 |
| <b>Outcomes</b>                              |                   |                   |                   |      |
| Hospitalization within 29 days after culture | 10 (37.0)         | 5 (38.5)          | 5 (35.7)          | 0.86 |
| ICU admission ***^                           | 4 (40.0)          | 2 (40.0)          | 2 (40.0)          | 1.00 |
| In-hospital mortality ^                      | 1 (10.0)          | 1 (20.0)          | 0 (0.0)           | 0.59 |
| 90-day Mortality                             | 5 (18.5)          | 4 (30.8)          | 1 (7.1)           | 0.28 |

402

403 \*1 *mcr-10* positive isolate

404 \*\* MIC units : µg/mL

405 \*\*\* Any ICU admission 7 days prior or 6 days after specimen collection

406 ^ among 10 hospitalized patients, 5 in each group (*mcr-9* positive and negative)

407

408 **Table 2. Highest ranking genes for association with *mcr-9* presence**

409

| <b>Gene*</b>  | <b>Comment</b>                              | <b>Odds Ratio</b> | <b>Bonferroni<br/>adjusted <i>p</i>-<br/>value</b> |
|---------------|---------------------------------------------|-------------------|----------------------------------------------------|
| <i>smc</i>    | Chromosome partition protein Smc            | ∞                 | 1.60E-06                                           |
| <i>dcm2</i>   | DNA-cytosine methyltransferase              | ∞                 | 1.60E-06                                           |
| <i>pcoE2</i>  | putative copper-binding protein PcoE        | ∞                 | 2.88E-05                                           |
| <i>hns2</i>   | DNA-binding protein H-NS, plasmid           | ∞                 | 3.36E-05                                           |
| group_10390   | Tn3 family transposase ISEc63               | ∞                 | 3.36E-05                                           |
| <i>hipA</i>   | Serine/threonine-protein kinase toxin HipA  | ∞                 | 3.36E-05                                           |
| <i>rcnR2</i>  | Transcriptional repressor RcnR              | ∞                 | 0.00030219                                         |
| <i>hha2</i>   | Hemolysin expression-modulating protein Hha | ∞                 | 0.00036934                                         |
| <i>uvrD2</i>  | DNA helicase II                             | ∞                 | 0.00036934                                         |
| parM          | Plasmid segregation protein                 | ∞                 | 0.00036934                                         |
| <i>higB-1</i> | Toxin HigB-1                                | ∞                 | 0.00036934                                         |
| group_1846    | Tn3 family transposase ISEc63               | ∞                 | 0.00036934                                         |
| <i>dam2</i>   | DNA adenine methylase                       | ∞                 | 0.00036934                                         |
| <i>repB</i>   | RepFIB replication protein A                | ∞                 | 0.00036934                                         |
| <i>traC</i>   | Protein TraC                                | ∞                 | 0.00036934                                         |
| group_7173    | Stable plasmid inheritance protein          | ∞                 | 0.00036934                                         |
| <i>yjcD</i>   | Putative ATP-dependent DNA helicase YjcD    | 304               | 0.00054522                                         |
| <i>umuD2</i>  | Protein UmuD                                | ∞                 | 0.00283164                                         |

|               |                                                  |          |            |
|---------------|--------------------------------------------------|----------|------------|
| <i>dsbC_2</i> | Thiol:disulfide interchange protein DsbC         | $\infty$ | 0.00283164 |
| <i>virB</i>   | Virulence regulon transcriptional activator VirB | $\infty$ | 0.00283164 |
| <i>umuC_3</i> | Protein UmuC                                     | $\infty$ | 0.00283164 |
| group_7174    | IS110 family transposase ISEsa2                  | 142.5    | 0.00540586 |
| <i>merA</i>   | Mercuric reductase                               | $\infty$ | 0.01698985 |
| <i>fieF_2</i> | Ferrous-iron efflux pump FieF                    | 90.7     | 0.03283809 |
| <i>arsB_2</i> | Arsenical pump membrane protein                  | 67.5     | 0.04368339 |
| group_7063    | ISNCY family transposase ISEsa1                  | 67.5     | 0.04368339 |
| group_8953    | ISNCY family transposase ISBcen27                | 67.5     | 0.04368339 |
| <i>arsH</i>   | NADPH-dependent FMN reductase ArsH               | 67.5     | 0.04368339 |
| <i>arsC2</i>  | Arsenate reductase                               | 67.5     | 0.04368339 |

---

410

411 hypothetical proteins not included

412

413

414

415

416

417 **Figure 1.**

418

419

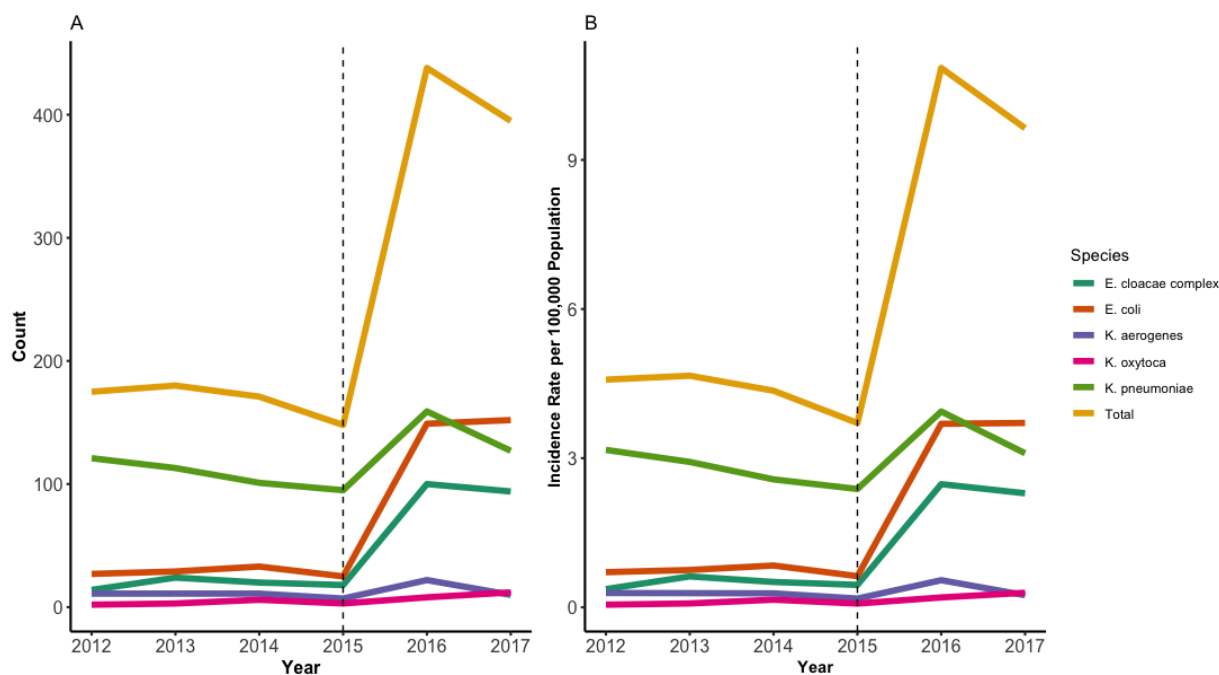

420

421

422 **Figure Legend 1.** Carbapenem-resistant Enterobacteriales (CRE) count (A) and crude

423 annual incidence per 100,000 population (B) by species across from the Georgia

424 Emerging Infections program from 2012 to 2017. Beginning in 2016, the phenotypic

425 CRE case definition was changed to resistance to  $\geq 1$  carbapenem (now including

426 ertapenem) with no cephalosporin parameter.

427

428

429

430

431 **Figure 2**

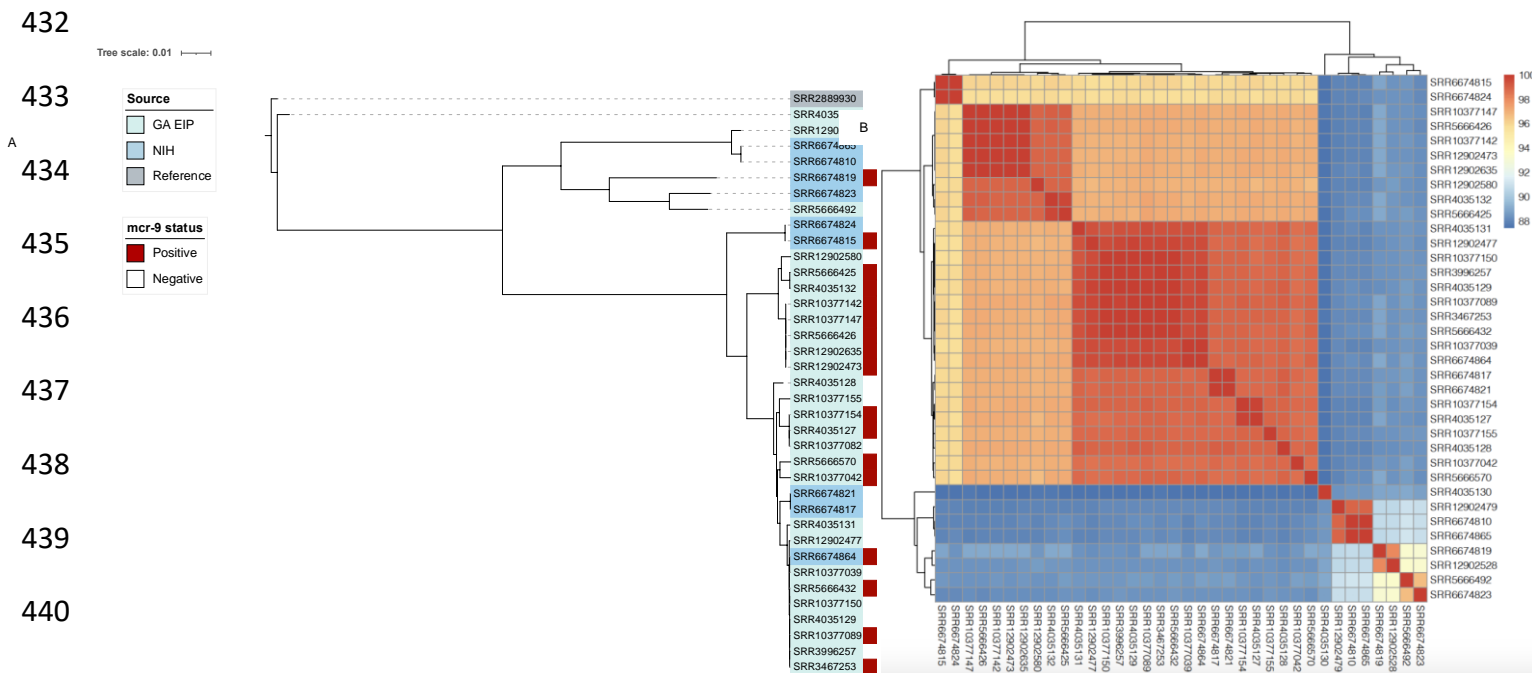

443 **Figure Legend 2:** Phylogeny (A) and average nucleotide identity heatmap (B) of *mcr-9*

444 positive (n=13) and *mcr-9* negative (n=14) *E. cloacae* complex genomes from Georgia

445 Emerging Infection program in addition to 9 available *E. cloacae* complex genomes

446 (three *mcr-9* positive, six *mcr-9* negative) from the National Institutes of Health. A

447 phylogenetic tree based on a core gene alignment containing 1,904 genes defined

448 using Roary v3.13.0. was generated using IQtree v2.0.3. A maximum likelihood tree

449 was generated by running 1,000 bootstrap replicates under the generalized time-

450 reversible model of evolution. The tree was visualized and annotated using Interactive

451 Tree of Life (iTOL) v4. Pairwise comparisons of average nucleotide identity on the

452 assembled genomes were performed with the Mashmap method using fastANI v1.32.

453



454 Abbreviations: GA EIP: Georgia Emerging Infections Program, NIH: National Institutes

455 of Health,

456

457 **Figure 3**

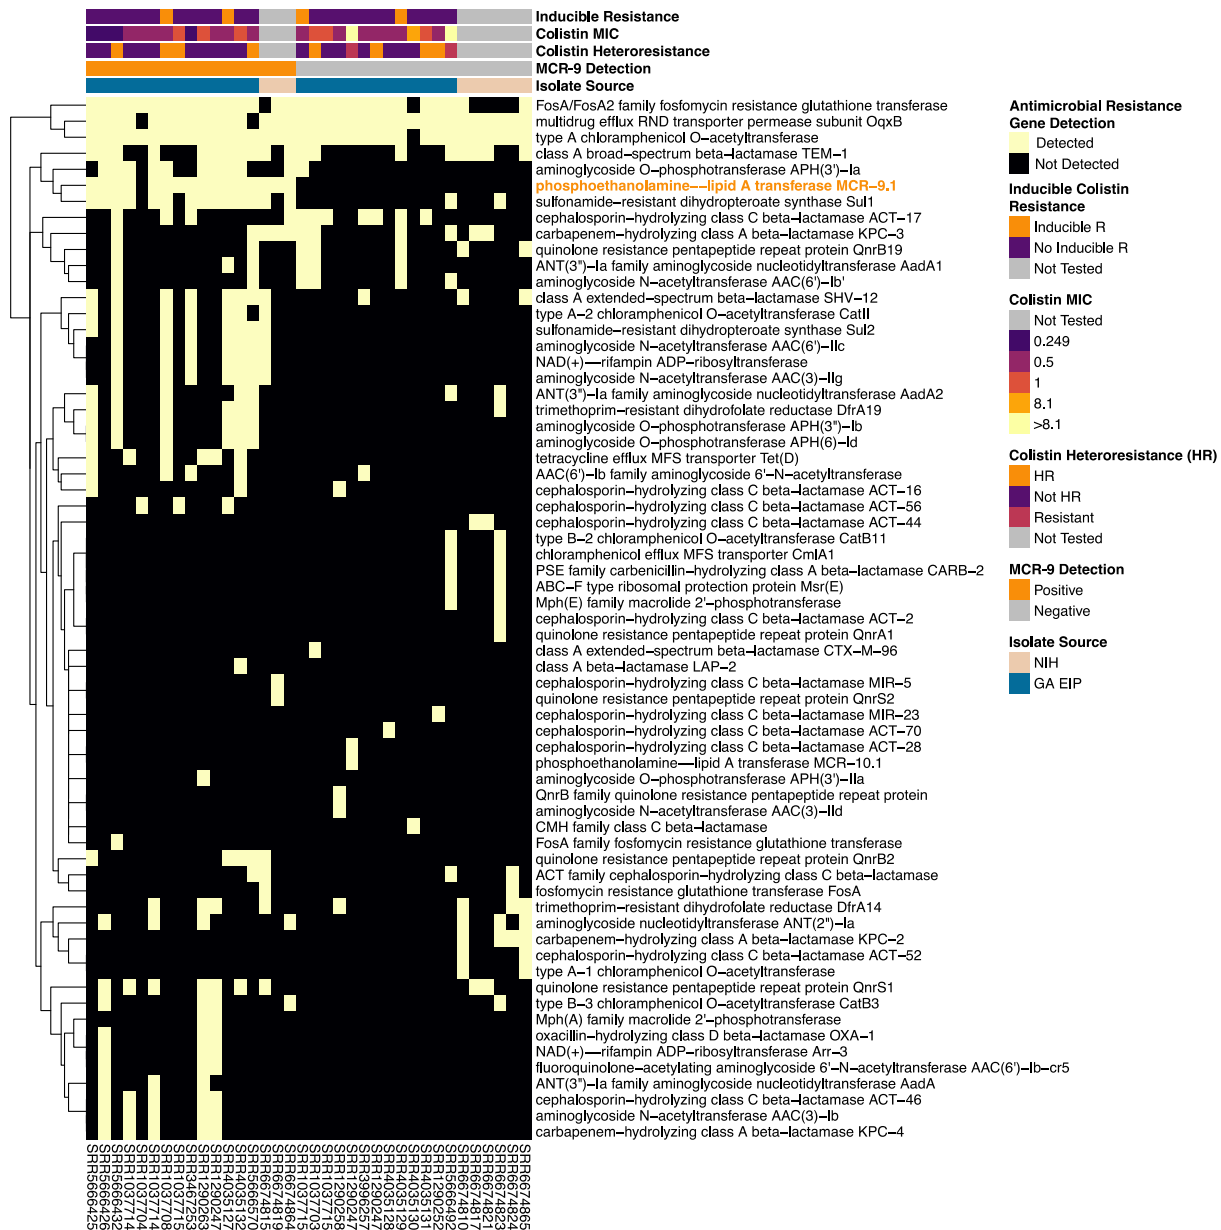

458

459 **Figure 3 Legend:** Antimicrobial resistance gene heatmap of *mcr-9* positive (n=13) and  
460 *mcr-9* negative (n=14) *E. cloacae* complex genomes from Georgia Emerging Infections  
461 program in addition to 9 available *E. cloacae* complex A genomes (three *mcr-9* positive,  
462 six *mcr-9* negative) from the National Institutes of Health. Genomes were annotated  
463 using Prodigal v2.6.3 and antimicrobial resistance gene content was assessed using

464 AMRFinder Antimicrobial resistance gene presence/absence heatmaps were  
465 created using the package pheatmap on R version 4.0.2 (Vienna, Austria) and the  
466 RStudio interface version 1.3.1073 (Boston, MA, USA).

467 **References**

468

- 469 1. Babiker A, Clarke LG, Saul M, Gealey JA, Clancy CJ, Nguyen MH, Shields RK. 2020.  
470 Changing epidemiology and decreased mortality associated with Carbapenem-resistant  
471 Gram-negative bacteria from 2000 - 2017. Clin Infect Dis doi:10.1093/cid/ciaa1464.
- 472 2. Babiker A, Evans DR, Griffith MP, McElheny CL, Hassan M, Clarke LG, Mettus RT,  
473 Harrison LH, Doi Y, Shields RK, Van Tyne D. 2020. Clinical and Genomic Epidemiology  
474 of Carbapenem-Nonsusceptible *Citrobacter* spp. at a Tertiary Health Care Center over 2  
475 Decades. Journal of Clinical Microbiology 58:e00275-20.
- 476 3. World Health Organization. 2019. Critically important antimicrobials for human  
477 medicine, 6th revision  
478 . [www.who.int/foodsafety/publications/antimicrobials-sixth/en/](http://www.who.int/foodsafety/publications/antimicrobials-sixth/en/). Accessed 7th May 2021.
- 479 4. Eljaaly K, Bidell MR, Gandhi RG, Alshehri S, Enani MA, Al-Jedai A, Lee TC. 2021.  
480 Colistin Nephrotoxicity: Meta-analysis of Randomized Controlled Trials. Open Forum  
481 Infectious Diseases doi:10.1093/ofid/ofab026.
- 482 5. Strich JR, Ricotta E, Warner S, Lai YL, Demirkale CY, Hohmann SF, Rhee C, Klompas  
483 M, Palmore T, Powers JH, Dekker JP, Adjemian J, Matsouaka R, Woods CW, Danner  
484 RL, Kadri SS. 2021. Pharmacoepidemiology of Ceftazidime-Avibactam Use: A  
485 Retrospective Cohort Analysis of 210 US Hospitals. Clin Infect Dis 72:611-621.
- 486 6. Liu YY, Wang Y, Walsh TR, Yi LX, Zhang R, Spencer J, Doi Y, Tian G, Dong B, Huang  
487 X, Yu LF, Gu D, Ren H, Chen X, Lv L, He D, Zhou H, Liang Z, Liu JH, Shen J. 2016.  
488 Emergence of plasmid-mediated colistin resistance mechanism *mcr-1* in animals and  
489 human beings in China: a microbiological and molecular biological study. Lancet Infect  
490 Dis 16:161-8.

- 491 7. Ling Z, Yin W, Shen Z, Wang Y, Shen J, Walsh TR. 2020. Epidemiology of mobile  
492 colistin resistance genes *mcr-1* to *mcr-9*. Journal of Antimicrobial Chemotherapy  
493 75:3087-3095.
- 494 8. Carroll LM, Gaballa A, Guldumann C, Sullivan G, Henderson LO, Wiedmann M. 2019.  
495 Identification of Novel Mobilized Colistin Resistance Gene *mcr-9* in a Multidrug-  
496 Resistant, Colistin-Susceptible *Salmonella enterica* Serotype Typhimurium Isolate. mBio  
497 10:e00853-19.
- 498 9. Li Y, Dai X, Zeng J, Gao Y, Zhang Z, Zhang L. 2020. Characterization of the global  
499 distribution and diversified plasmid reservoirs of the colistin resistance gene *mcr-9*.  
500 Scientific Reports 10:8113.
- 501 10. Munoz-Price LS, Poirel L, Bonomo RA, Schwaber MJ, Daikos GL, Cormican M,  
502 Cornaglia G, Garau J, Gniadkowski M, Hayden MK, Kumarasamy K, Livermore DM,  
503 Maya JJ, Nordmann P, Patel JB, Paterson DL, Pitout J, Villegas MV, Wang H, Woodford  
504 N, Quinn JP. 2013. Clinical epidemiology of the global expansion of *Klebsiella*  
505 *pneumoniae* carbapenemases. Lancet Infect Dis 13:785-96.
- 506 11. Wilson BM, El Chakhtoura NG, Patel S, Saade E, Donskey CJ, Bonomo RA, Perez F.  
507 2017. Carbapenem-Resistant *Enterobacter cloacae* in Patients from the US Veterans  
508 Health Administration, 2006-2015. Emerg Infect Dis 23:878-880.
- 509 12. Annavajhala MK, Gomez-Simmonds A, Uhlemann AC. 2019. Multidrug-Resistant  
510 *Enterobacter cloacae* Complex Emerging as a Global, Diversifying Threat. Front  
511 Microbiol 10:44.
- 512 13. Chea N, Bulens SN, Kongphet-Tran T, Lynfield R, Shaw KM, Vagnone PS, Kainer MA,  
513 Muleta DB, Wilson L, Vaeth E, Dumyati G, Concannon C, Phipps EC, Culbreath K,  
514 Janelle SJ, Bamberg WM, Guh AY, Limbago B, Kallen AJ. 2015. Improved Phenotype-  
515 Based Definition for Identifying Carbapenemase Producers among Carbapenem-  
516 Resistant Enterobacteriaceae. Emerging infectious diseases 21:1611-1616.

- 517 14. Kadri SS, Lai YL, Ricotta EE, Strich JR, Babiker A, Rhee C, Klompas M, Dekker JP,  
518 Powers JH, III, Danner RL, Adjemian J, Initiative NAROR. 2019. External Validation of  
519 Difficult-to-Treat Resistance Prevalence and Mortality Risk in Gram-Negative  
520 Bloodstream Infection Using Electronic Health Record Data From 140 US Hospitals.  
521 *Open Forum Infectious Diseases* 6.
- 522 15. Kadri SS, Adjemian J, Lai YL, Spaulding AB, Ricotta E, Prevots DR, Palmore TN, Rhee  
523 C, Klompas M, Dekker JP, Powers JH, 3rd, Suffredini AF, Hooper DC, Fridkin S, Danner  
524 RL. 2018. Difficult-to-Treat Resistance in Gram-negative Bacteremia at 173 US  
525 Hospitals: Retrospective Cohort Analysis of Prevalence, Predictors, and Outcome of  
526 Resistance to All First-line Agents. *Clin Infect Dis* 67:1803-1814.
- 527 16. Weingarten RA, Johnson RC, Conlan S, Ramsburg AM, Dekker JP, Lau AF, Khil P,  
528 Odom RT, Deming C, Park M, Thomas PJ, Henderson DK, Palmore TN, Segre JA,  
529 Frank KM. 2018. Genomic Analysis of Hospital Plumbing Reveals Diverse Reservoir of  
530 Bacterial Plasmids Conferring Carbapenem Resistance. *mBio* 9.
- 531 17. Kieffer N, Royer G, Decousser J-W, Bourrel A-S, Palmieri M, Ortiz De La Rosa J-M,  
532 Jacquier H, Denamur E, Nordmann P, Poirel L. 2019. *mcr-9* an Inducible Gene Encoding  
533 an Acquired Phosphoethanolamine Transferase in *Escherichia coli*, and Its Origin.  
534 *Antimicrobial Agents and Chemotherapy* 63:e00965-19.
- 535 18. Breland EJ, Zhang EW, Bermudez T, Martinez CR, 3rd, Hadjifrangiskou M. 2017. The  
536 Histidine Residue of QseC Is Required for Canonical Signaling between QseB and PmrB  
537 in Uropathogenic *Escherichia coli*. *J Bacteriol* 199.
- 538 19. Tyson GH, Li C, Hsu C-H, Ayers S, Borenstein S, Mukherjee S, Tran T-T, McDermott  
539 PF, Zhao S. 2020. The *mcr-9* Gene of *Salmonella* and *Escherichia coli* is Not Associated  
540 with Colistin Resistance in the United States. *Antimicrobial Agents and Chemotherapy*  
541 64:e00573-20.

- 542 20. Nicoloff H, Hjort K, Levin BR, Andersson DI. 2019. The high prevalence of antibiotic  
543 heteroresistance in pathogenic bacteria is mainly caused by gene amplification. *Nat*  
544 *Microbiol* 4:504-514.
- 545 21. Band VI, Satola SW, Burd EM, Farley MM, Jacob JT, Weiss DS, Hunstad DA, Hultgren  
546 SJ. 2018. Carbapenem-Resistant *Klebsiella pneumoniae* Exhibiting Clinically  
547 Undetected Colistin Heteroresistance Leads to Treatment Failure in a Murine Model of  
548 Infection. *mBio* 9:e02448-17.
- 549 22. Band VI, Satola SW, Smith RD, Hufnagel DA, Bower C, Conley AB, Rishishwar L, Dale  
550 SE, Hardy DJ, Vargas RL, Dumyati G, Kainer MA, Phipps EC, Pierce R, Wilson LE,  
551 Sorensen M, Nilsson E, Jordan IK, Burd EM, Farley MM, Jacob JT, Ernst RK, Weiss DS.  
552 2021. Colistin Heteroresistance Is Largely Undetected among Carbapenem-Resistant  
553 Enterobacterales in the United States. *mBio* 12:e02881-20.
- 554 23. Centers for Disease Control. 2019. Antibiotic resistance threats in the United States,  
555 2019.
- 556 24. Germain E, Castro-Roa D, Zenkin N, Gerdes K. 2013. Molecular mechanism of bacterial  
557 persistence by *HipA*. *Mol Cell* 52:248-54.
- 558 25. Nguyen CC, Hugie CN, Kile ML, Navab-Daneshmand T. 2019. Association between  
559 heavy metals and antibiotic-resistant human pathogens in environmental reservoirs: A  
560 review. *Frontiers of Environmental Science & Engineering* 13:46.
- 561 26. Kizny Gordon AE, Mathers AJ, Cheong EYL, Gottlieb T, Kotay S, Walker AS, Peto TEA,  
562 Crook DW, Stoesser N. 2017. The Hospital Water Environment as a Reservoir for  
563 Carbapenem-Resistant Organisms Causing Hospital-Acquired Infections—A Systematic  
564 Review of the Literature. *Clinical Infectious Diseases* 64:1435-1444.
- 565 27. Kamathewatta K, Bushell R, Rafa F, Browning G, Billman-Jacobe H, Marenda M. 2020.  
566 Colonization of a hand washing sink in a veterinary hospital by an *Enterobacter*

- 567 *hormaechei* strain carrying multiple resistances to high importance antimicrobials.  
568 Antimicrobial Resistance & Infection Control 9:163.
- 569 28. Jernigan JA, Hatfield KM, Wolford H, Nelson RE, Olubajo B, Reddy SC, McCarthy N,  
570 Paul P, McDonald LC, Kallen A, Fiore A, Craig M, Baggs J. 2020. Multidrug-Resistant  
571 Bacterial Infections in U.S. Hospitalized Patients, 2012-2017. N Engl J Med 382:1309-  
572 1319.
- 573 29. Chen HD, Groisman EA. 2013. The biology of the PmrA/PmrB two-component system:  
574 the major regulator of lipopolysaccharide modifications. Annu Rev Microbiol 67:83-112.
- 575 30. Gwozdzinski K, Azarderakhsh S, Imirzalioglu C, Falgenhauer L, Chakraborty T. 2018.  
576 An Improved Medium for Colistin Susceptibility Testing. Journal of Clinical Microbiology  
577 56:e01950-17.
- 578 31. Clinical and Laboratory Standards Institute. 2021. Performance standards for  
579 antimicrobial susceptibility testing, 31st informational supplement.
- 580 32. Luo Q, Niu T, Wang Y, Yin J, Wan F, Yao M, Lu H, Xiao Y, Li L. 2019. In vitro reduction  
581 of colistin susceptibility and comparative genomics reveals multiple differences between  
582 MCR-positive and MCR-negative colistin-resistant *Escherichia coli*. Infection and drug  
583 resistance 12:1665-1674.
- 584 33. Bolger AM, Lohse M, Usadel B. 2014. Trimmomatic: a flexible trimmer for Illumina  
585 sequence data. Bioinformatics 30:2114-20.
- 586 34. Prjibelski A, Antipov D, Meleshko D, Lapidus A, Korobeynikov A. 2020. Using SPAdes  
587 De Novo Assembler. Current Protocols in Bioinformatics 70:e102.
- 588 35. Jain C, Rodriguez-R LM, Phillippy AM, Konstantinidis KT, Aluru S. 2018. High  
589 throughput ANI analysis of 90K prokaryotic genomes reveals clear species boundaries.  
590 Nature Communications 9:5114.



- 591 36. Hyatt D, Chen GL, Locascio PF, Land ML, Larimer FW, Hauser LJ. 2010. Prodigal:  
592 prokaryotic gene recognition and translation initiation site identification. *BMC*  
593 *Bioinformatics* 11:119.
- 594 37. Seemann T. 2014. Prokka: rapid prokaryotic genome annotation. *Bioinformatics*  
595 30:2068-9.
- 596 38. Feldgarden M, Brover V, Gonzalez-Escalona N, Frye JG, Haendiges J, Haft DH,  
597 Hoffmann M, Pettengill JB, Prasad AB, Tillman GE, Tyson GH, Klimke W. 2021.  
598 AMRFinderPlus and the Reference Gene Catalog facilitate examination of the genomic  
599 links among antimicrobial resistance, stress response, and virulence. *Sci Rep* 11:12728.
- 600 39. Zankari E, Allesøe R, Joensen KG, Cavaco LM, Lund O, Aarestrup FM. 2017.  
601 PointFinder: a novel web tool for WGS-based detection of antimicrobial resistance  
602 associated with chromosomal point mutations in bacterial pathogens. *J Antimicrob*  
603 *Chemother* 72:2764-2768.
- 604 40. Carattoli A, Zankari E, García-Fernández A, Voldby Larsen M, Lund O, Villa L, Møller  
605 Aarestrup F, Hasman H. 2014. In silico detection and typing of plasmids using  
606 PlasmidFinder and plasmid multilocus sequence typing. *Antimicrobial agents and*  
607 *chemotherapy* 58:3895-3903.
- 608 41. Page AJ, Cummins CA, Hunt M, Wong VK, Reuter S, Holden MTG, Fookes M, Falush  
609 D, Keane JA, Parkhill J. 2015. Roary: rapid large-scale prokaryote pan genome analysis.  
610 *Bioinformatics (Oxford, England)* 31:3691-3693.
- 611 42. Kalyanamoorthy S, Minh BQ, Wong TKF, von Haeseler A, Jeremiin LS. 2017.  
612 ModelFinder: fast model selection for accurate phylogenetic estimates. *Nature Methods*  
613 14:587-589.
- 614 43. Letunic I, Bork P. 2021. Interactive Tree Of Life (iTOL) v5: an online tool for phylogenetic  
615 tree display and annotation. *Nucleic Acids Research* doi:10.1093/nar/gkab301.

- 616 44. Brynildsrud O, Bohlin J, Scheffer L, Eldholm V. 2016. Rapid scoring of genes in  
617 microbial pan-genome-wide association studies with Scoary. *Genome Biol* 17:238.  
618

619 **Supplementary Material**

620 **Supplemental Table 1:** Definitions of carbapenem-resistant Enterobacterales

621 (CRE) and difficult-to-treat resistance (DTR) used during the study period.

622

623

| Definition                             | Period       | Species                                                                                                                                                                 | Susceptibility Phenotype                                                                                                                                                                                                                                                                    |
|----------------------------------------|--------------|-------------------------------------------------------------------------------------------------------------------------------------------------------------------------|---------------------------------------------------------------------------------------------------------------------------------------------------------------------------------------------------------------------------------------------------------------------------------------------|
| Initial GA EIP surveillance definition | 2011–2015    | <i>Escherichia coli</i><br><i>Klebsiella pneumoniae</i><br><i>Klebsiella oxytoca</i><br><i>Enterobacter cloacae</i> complex<br><i>Klebsiella aerogenes</i> <sup>a</sup> | <u>Intermediate or resistant to:</u><br>- Imipenem (MIC ≥2 µg/mL), or<br>- Meropenem (MIC ≥2 µg/mL), or<br>- Doripenem (MIC ≥2 µg/mL)<br><br><u>AND resistant to<sup>b</sup>:</u><br>- Ceftazidime (MIC ≥16 µg/mL), and<br>- Ceftriaxone (MIC ≥4 µg/mL), and<br>- Cefotaxime (MIC ≥4 µg/mL) |
| Revised GA EIP surveillance definition | 2016–present | <i>Escherichia coli</i><br><i>Klebsiella pneumoniae</i><br><i>Klebsiella oxytoca</i><br><i>Enterobacter cloacae</i> complex<br><i>Klebsiella aerogenes</i> <sup>a</sup> | <u>Resistant to:</u><br>- Imipenem (MIC ≥4 µg/mL), or<br>- Meropenem (MIC ≥4 µg/mL), or<br>- Doripenem (MIC ≥4 µg/mL), or<br>- Ertapenem (MIC ≥2 µg/mL)                                                                                                                                     |

|     |           |                                        |                                                                                                                            |
|-----|-----------|----------------------------------------|----------------------------------------------------------------------------------------------------------------------------|
| DTR | 2011–2017 | <i>Enterobacter cloacae</i><br>complex | Intermediate or resistant to all tested and reported agents in carbapenem, $\beta$ -lactam, and fluoroquinolone categories |
|     |           |                                        |                                                                                                                            |

624

625 a. Formerly *Enterobacter aerogenes*

626 b. If the antibiotics were tested

627

628 Abbreviations: GA EIP: Georgia Emerging Infections Program; DTR: difficult-to-treat

629 resistance; MIC: minimum inhibitory concentrations

630

631

632

633 **Supplementary Table 2: Antimicrobial Susceptibility testing of Carbapenem-**

634 **resistant *E. cloacae* complex by *mcr-9* status**

635

636

| Antibiotic              | Median (range) MIC*             |                                 | Susceptible N (%)                  |                                    | Intermediate N (%)**               |                                    | Resistant N (%)                    |                                    | P value<br>*** |
|-------------------------|---------------------------------|---------------------------------|------------------------------------|------------------------------------|------------------------------------|------------------------------------|------------------------------------|------------------------------------|----------------|
|                         | <i>mcr-9</i> positive<br>(n=13) | <i>mcr-9</i> negative<br>(n=14) | <i>mcr-9</i><br>positive<br>(n=13) | <i>mcr-9</i><br>negative<br>(n=14) | <i>mcr-9</i><br>positive<br>(n=13) | <i>mcr-9</i><br>negative<br>(n=14) | <i>mcr-9</i><br>positive<br>(n=13) | <i>mcr-9</i><br>negative<br>(n=14) |                |
|                         |                                 |                                 |                                    |                                    |                                    |                                    |                                    |                                    |                |
| <b>Aminoglycosides</b>  |                                 |                                 |                                    |                                    |                                    |                                    |                                    |                                    |                |
| Amikacin                | ≤1 (≤1->64)                     | ≤1 (≤1-16)                      | 12 (92.3)                          | 14 (100)                           | 0 (0)                              | 0 (0)                              | 1 (7.7)                            | 0 (0)                              | 0.97           |
| Gentamicin              | 8 (≤0.25->16)                   | 0.37 (≤0.25->16)                | 4 (30.8)                           | 11 (78.6)                          | 3 (23.1)                           | 1 (7.1)                            | 6 (46.2)                           | 2 (14.3)                           | 0.04           |
| Tobramycin              | 8 (≤0.5->16)                    | ≤0.5 (≤0.5->16)                 | 3 (23.1)                           | 9 (64.3)                           | 4 (30.8)                           | 2 (14.3)                           | 6 (46.2)                           | 3 (21.4)                           | 0.10           |
| <b>B-lactams</b>        |                                 |                                 |                                    |                                    |                                    |                                    |                                    |                                    |                |
| Aztreonam               | >64 (64->64)                    | >64 (32->64)                    | 0 (0)                              | 0 (0)                              | 0 (0)                              | 0 (0)                              | 13 (100)                           | 14 (100)                           | n/a            |
| Ceftriaxone             | >32 (16->32)                    | >32 (32->32)                    | 0 (0)                              | 0 (0)                              | 0 (0)                              | 0 (0)                              | 13 (100)                           | 14 (100)                           | n/a            |
| Ceftazidime             | >128 (64->128)                  | >128 (64->128)                  | 0 (0)                              | 0 (0)                              | 0 (0)                              | 0 (0)                              | 13 (100)                           | 14 (100)                           | n/a            |
| Cefepime                | >32 (1->32)                     | 16 (≤0.5->32)                   | 1 (7.7)                            | 5 (35.7)                           | 1 (7.7)                            | 1 (7.1)                            | 11 (84.6)                          | 8 (57.1)                           | 0.21           |
| Ertapenem               | 8 (≤0.12->8)                    | 4 (0.25->8)                     | 2 (15.4)                           | 3 (21.4)                           | 0 (0)                              | 0 (0)                              | 11 (84.6)                          | 11 (78.6)                          | 1.00           |
| Doripenem               | 2 (≤0.12->8)                    | 1 (≤0.12->8)                    | 5 (38.5)                           | 8 (57.1)                           | 3 (23.1)                           | 2 (14.3)                           | 5 (38.5)                           | 4 (28.6)                           | 0.61           |
| Imipenem                | 2 (≤0.5->8)                     | 1 (≤0.5->64)                    | 5 (38.5)                           | 7 (50.0)                           | 2 (15.4)                           | 1 (7.1)                            | 6 (46.2)                           | 6 (42.9)                           | 0.73           |
| Piperacillin-Tazobactam | >128 (16->128)                  | >128 (≤4->128)                  | 1 (7.7)                            | 1 (7.1)                            | 1 (7.7)                            | 0 (0)                              | 11 (84.6)                          | 13 (92.9)                          | 0.57           |
| Meropenem               | 2 (≤0.12->8)                    | 0.5 (≤0.12->8)                  | 5 (38.5)                           | 8 (57.1)                           | 4 (30.8)                           | 0 (0)                              | 4 (30.8)                           | 6 (42.9)                           | 0.08           |
| <b>Fluoroquinolones</b> |                                 |                                 |                                    |                                    |                                    |                                    |                                    |                                    |                |
| Ciprofloxacin           | >8 (0.5->8)                     | 3 (≤0.25->8)                    | 0 (0)                              | 6 (42.9)                           | 1 (7.7)                            | 0 (0)                              | 12 (92.3)                          | 8 (57.1)                           | 0.02           |
| Levofloxacin            | >8 (0.1->8)                     | 3 (≤0.12->8)                    | 0 (0)                              | 6 (42.9)                           | 1 (7.7)                            | 0 (0)                              | 12 (92.3)                          | 8 (57.1)                           | 0.02           |
| <b>Tetracyclines</b>    |                                 |                                 |                                    |                                    |                                    |                                    |                                    |                                    |                |
| Tetracycline            | 16 (≤2.0->32)                   | 4 (≤2-32)                       | 5 (38.5)                           | 9 (64.3)                           | 1 (7.7)                            | 1 (7.1)                            | 7 (53.8)                           | 4 (28.6)                           | 0.38           |
| Tigecycline             | 1 (≤0.5->4)                     | 0.76 (≤0.5->4)                  | 11 (84.6)                          | 9 (64.3)                           | 1 (7.7)                            | 4 (28.6)                           | 1 (7.7)                            | 1 (7.1)                            | 0.37           |
| <b>Miscellaneous</b>    |                                 |                                 |                                    |                                    |                                    |                                    |                                    |                                    |                |
| Trimethoprim-           | >8 (1->8)                       | (≤0.5 (≤0.5->8)                 | 2 (15.4)                           | 12 (85.7)                          | 0 (0)                              | 0 (0)                              | 11 (84.6)                          | 2 (14.3)                           | 0.001          |

Sulfamethoxazole

---

637

638 \* MICs in  $\mu\text{g/mL}$

639 \*\* Intermediate is equivalent to the category susceptible dose dependent for cefepime

640 \*\*\* Calculated for proportion *mcr-9* positive categorized as S/I/R compared to *mcr-9*

641 negative isolates.

642

643 Abbreviation: MIC: minimum inhibitory concentration

644

645

646

647

648 **Supplementary Table 3: Plasmid contents of Carbapenem-resistant *E. cloacae***

649 **complex genomes by *mcr-9* status**

650

| Isolate                      | Plasmid       | Identity (%) | Plasmid Accession |
|------------------------------|---------------|--------------|-------------------|
| <b><i>mcr-9</i> positive</b> |               |              |                   |
| SRR10377147                  | ColRNAI       | 100          | DQ298019          |
|                              | IncFIA(HI1)   | 98.0         | AF250878          |
|                              | IncHI2A       | 100          | BX664015          |
|                              | pKPC-CAV1193  | 98.7         | CP013325          |
| SRR3467253                   | IncHI2A       | 100          | BX664015          |
| SRR4035127                   | IncHI2A       | 99.5         | BX664015          |
|                              | IncFII(pECLA) | 96.8         | CP001919          |
|                              | IncFIB(pECLA) | 99.5         | CP001919          |
| SRR4035132                   | IncHI2A       | 100          | BX664015          |
|                              | IncR          | 100          | DQ449578          |
| SRR5666570                   | Col440I       | 83.2         | CP023920          |
|                              | IncFII(pECLA) | 96.1         | CP001919          |
|                              | IncHI2A       | 100          | BX664015          |
|                              | pKPC-CAV1193  | 98.7         | CP013325          |
| SRR5666425                   | IncHI2A       |              | BX664015          |
| SRR5666426                   | IncFIA(HI1)   | 98.0         | AF250878          |
|                              | IncHI2A       | 100          | BX664015          |
|                              | pKPC-CAV1193  | 98.7         | CP013325          |
| SRR5666432                   | IncFIB(pB171) | 91.2         | AB024946          |

|             |                |      |          |
|-------------|----------------|------|----------|
|             | IncFII(SARC14) | 94.8 | JQ418540 |
|             | IncHI2A        | 100  | BX664015 |
|             | pKPC-CAV1193   | 98.7 | CP013325 |
| SRR10377089 | Col440I        | 83.2 | CP023920 |
|             | Col440II       | 84.6 | CP023921 |
|             | IncHI2A        | 100  | BX664015 |
|             | IncX5          | 99.7 | MF062700 |
| SRR10377142 | IncFIA(HI1)    | 98.0 | AF250878 |
|             | IncFIB(pECLA)  | 100  | CP001919 |
|             | IncFII(pECLA)  | 100  | CP001919 |
|             | IncHI2A        | 100  | BX664015 |
| SRR10377154 | Col440II       | 83.9 | CP023921 |
|             | IncFIB(pECLA)  | 100  | CP001919 |
|             | IncFII(pECLA)  | 100  | CP001919 |
| SRR12902635 | IncFIA(HI1)    | 98.0 | AF250878 |
|             | IncFIB(pECLA)  | 100  | CP001919 |
|             | IncFII(pECLA)  | 100  | CP001919 |
|             | IncHI2A        | 100  | BX664015 |
|             | pKPC-CAV1193   | 98.7 | CP013325 |
| SRR12902473 | IncFIA(HI1)    | 97.8 | AF250878 |
|             | IncFIB(pECLA)  | 100  | CP001919 |
|             | IncFII(pECLA)  | 100  | CP001919 |
|             | IncHI2A        | 100  | BX664015 |
|             | pKPC-CAV1193   | 98.7 | CP013325 |
| SRR6674815  | Col440II       | 84.3 | CP023921 |
|             | IncFIB(pECLA)  | 100  | CP001919 |



|                              |                  |      |          |
|------------------------------|------------------|------|----------|
|                              | IncFII(pECLA)    | 99.6 | CP001919 |
|                              | IncHI2A          | 100  | BX664015 |
|                              | IncN             | 99.6 | AY046276 |
|                              | IncR             | 100  | DQ449578 |
|                              | Col(pHAD28)      |      |          |
|                              | Col440II         | 90.8 | CP023921 |
|                              | IncFIB(K)        | 84.8 | JN233704 |
| SRR6674819                   | IncFII(pECLA)    | 99.5 | CP001919 |
|                              | IncHI2A          | 100  | BX664015 |
|                              | IncQ2            | 94.2 | FJ696404 |
|                              | IncR             | 100  | DQ449578 |
| SRR6674864                   | IncHI2A          | 100  | BX664015 |
|                              | pKPC-CAV1193     | 100  | CP013325 |
| <b><i>mcr-9</i> negative</b> |                  |      |          |
| SRR3996257                   | Col440II         | 84.4 | CP023921 |
|                              | IncX3            | 100  | JN247852 |
| SRR4035128                   | n/a              |      |          |
| SRR4035129                   | Col440II         | 84.6 |          |
|                              | pKPC-CAV1193     | 100  | CP013325 |
| SRR4035130                   | n/a              |      |          |
| SRR4035131                   | n/a              |      |          |
| SRR12902528                  | Col440II         | 84.4 | CP023921 |
|                              | IncFII(pECLA)    | 99.9 | CP001919 |
|                              | IncFIB(pECLA)    | 100  | CP001919 |
| SRR5666492                   | IncFIB(pENTE01)  | 81.1 | CP000654 |
|                              | IncFII(pECLA)    | 100  | CP001919 |
|                              | IncHI1A(NDM-CIT) | 100  | JX182975 |

|             |                   |      |          |
|-------------|-------------------|------|----------|
|             | IncHI1B(pNDM-CIT) | 99.1 | JX182975 |
|             | Col440II          | 84.4 | CP023921 |
|             | IncFIB(pB171)     | 91.2 | AB024946 |
| SRR10377150 | IncFIB(pHCM2)     | 97.5 | AL513384 |
|             | IncFII(SARC14)    | 94.8 | JQ418540 |
|             | pKPC-CAV1193      | 98.7 | CP013325 |
|             | IncX5             | 100  |          |
| SRR10377039 | pKPC-CAV1193      | 100  | CP013325 |
|             | IncFIA(HI1)       | 97.8 | AF250878 |
|             | IncFIB(pECLA)     | 100  | CP001919 |
| SRR10377142 | IncFII(pECLA)     | 100  | CP001919 |
|             | IncHI2A           | 100  | BX664015 |
|             | IncFII(pECLA)     | 97.5 |          |
| SRR10377155 | IncR              | 94.0 |          |
|             | IncFIB(pECLA)     | 100  | CP001919 |
| SRR12902580 | IncFII(pECLA)     | 100  | CP001919 |
|             | IncFIB(pECLA)     | 100  | CP001919 |
| SRR12902479 | IncFII(pECLA)     | 100  | CP001919 |
|             | IncFIB(pHCM2)     | 97.3 | AL513384 |
| SRR12902477 | IncFIB(pQil)      | 100  | JN233705 |
| SRR3996257  | IncX3             | 100  | JN247852 |
| SRR6674810  | IncN              | 99.8 | AY046276 |
|             | IncFIB(pECLA)     | 100  | CP001919 |
|             | IncFIB(pENTE01)   | 80.7 | CP000654 |
| SRR6674817  | IncFIB(pQil)      | 100  | JN233705 |
|             | IncFII(pECLA)     | 97.9 | CP001919 |
|             | IncQ2             | 81.1 | FJ696404 |

|            |                  |      |          |
|------------|------------------|------|----------|
|            | pKPC-CAV1193     | 100  | CP013325 |
|            | IncFIB(pECLA)    | 100  | CP001919 |
|            | IncFIB(pENTE01)  | 80.7 | CP000654 |
| SRR6674821 | IncFIB(pQil)     | 100  | JN233705 |
|            | IncFII(pECLA)    | 99.9 | CP001919 |
|            | IncQ2            | 81.1 | FJ696404 |
|            | pKPC-CAV1193     | 100  | CP013325 |
| SRR6674823 | IncFIB(pENTAS01) | 93.2 | CP003027 |
|            | IncFII(SARC14)   | 99.5 | JQ418540 |
|            | Col440II         | 84.0 | CP023921 |
|            | IncFIB(pECLA)    | 100  | CP001919 |
| SRR6674824 | IncFII(pECLA)    | 99.6 | CP001919 |
|            | IncN             | 99.8 | AY046276 |
|            | IncR             | 100  | DQ449578 |
| SRR6674865 | IncN             | 99.8 | AY046276 |

651

652

653 **Supplementary Figures**

654 **Supplementary Figure 1**

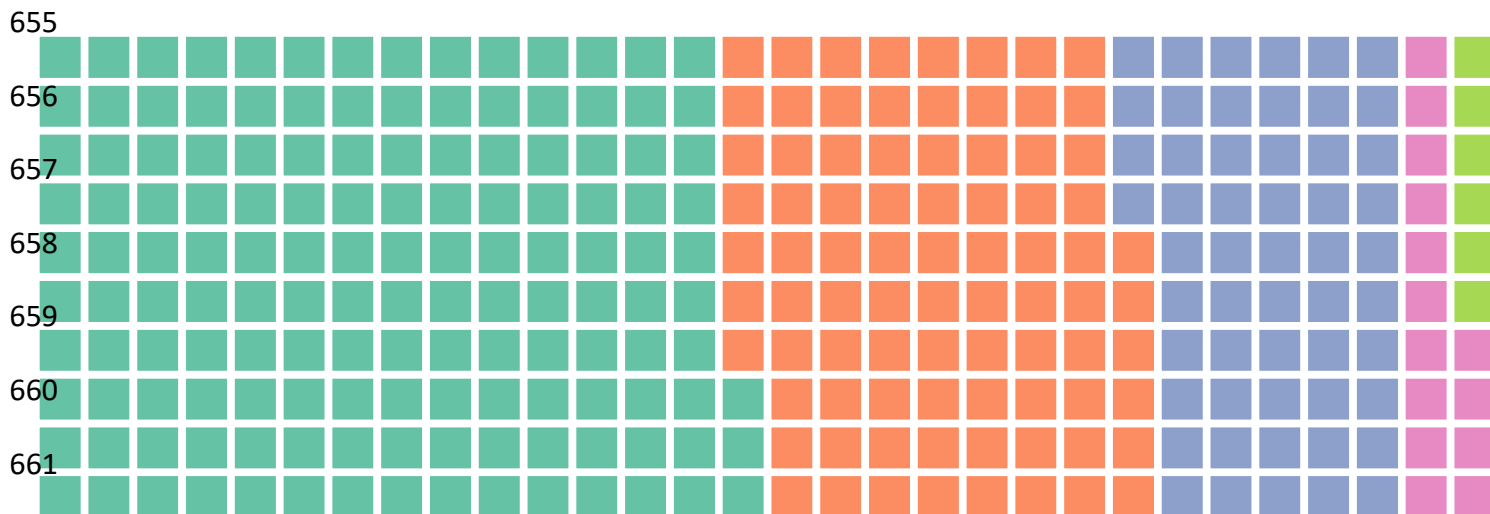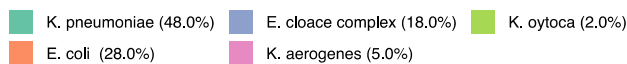

665 **Supplementary Figure 1 legend: Waffle-plot of Carbapenem-resistant**

666 Enterobacteriales cases by species collected by Georgia Emerging Infections Program

667 between 2012-2017.

668

669 **Supplementary Figure 2**

670

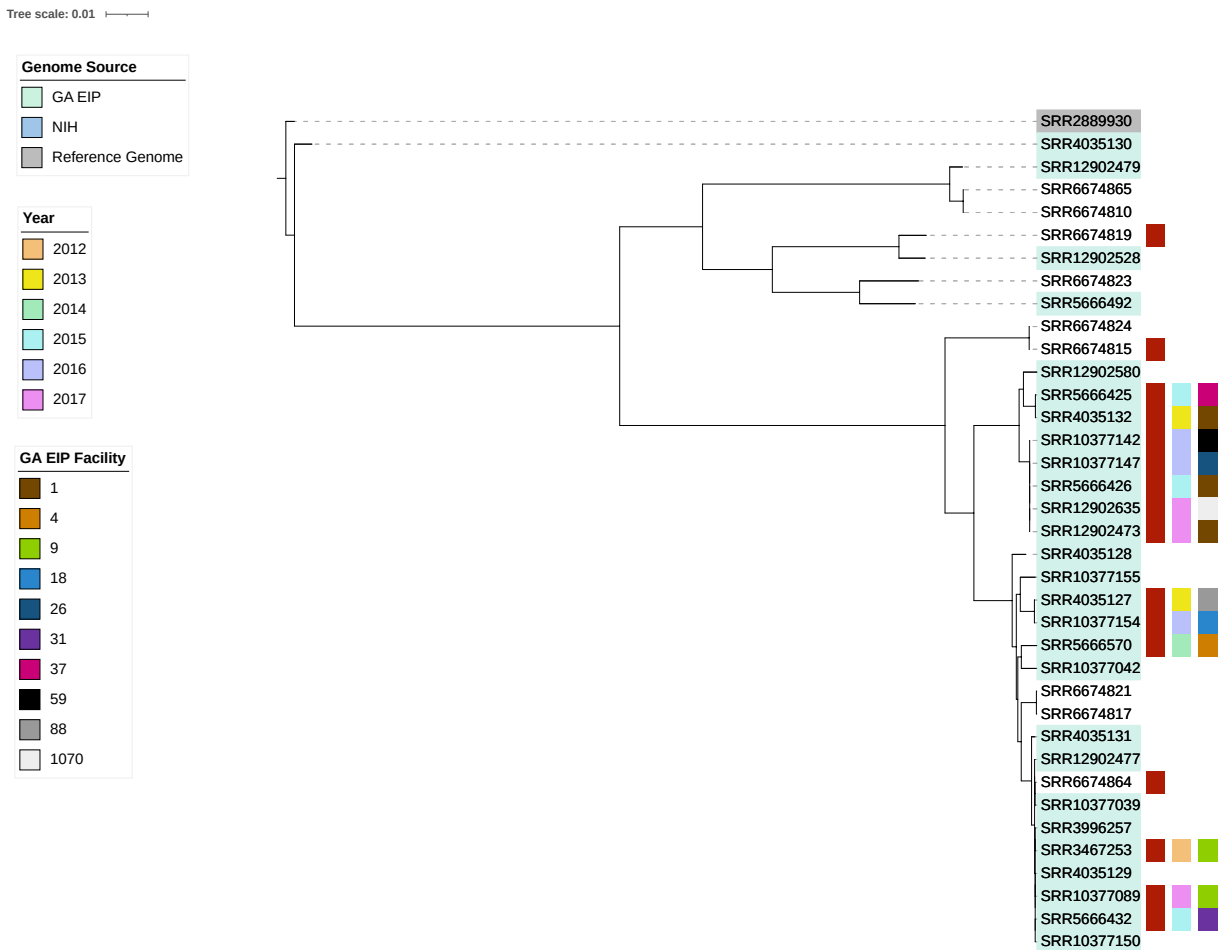

671

672

673 **Supplementary Figure 2 legend:** Phylogeny of *mcr-9* positive (n=13) and *mcr-9*  
674 negative (n=14) *E. cloacae* complex from Georgia Emerging Infections program (GA  
675 EIP) in addition to 9 available *E. cloacae* complex (three *mcr-9* positive, six *mcr-9*  
676 negative) from the National Institutes of Health. A phylogenetic tree based on a core  
677 gene alignment containing 1,904 genes defined using Roary v3.13.0. was generated  
678 using IQtree v2.0.3. A maximum likelihood tree was generated by running 1,000  
679 bootstrap replicates under the generalized time-reversible model of evolution. The tree

680 was visualized and Facility IDs and year of isolation were annotated using Interactive

681 Tree of Life (iTOL) v4. for GA EIP *mcr-9* positive genomes only.

682

683 Abbreviations: GA EIP: Georgia Emerging Infections Program, NIH: National Institutes

684 of Health

685

686

687 **Supplementary Figure 3**

688

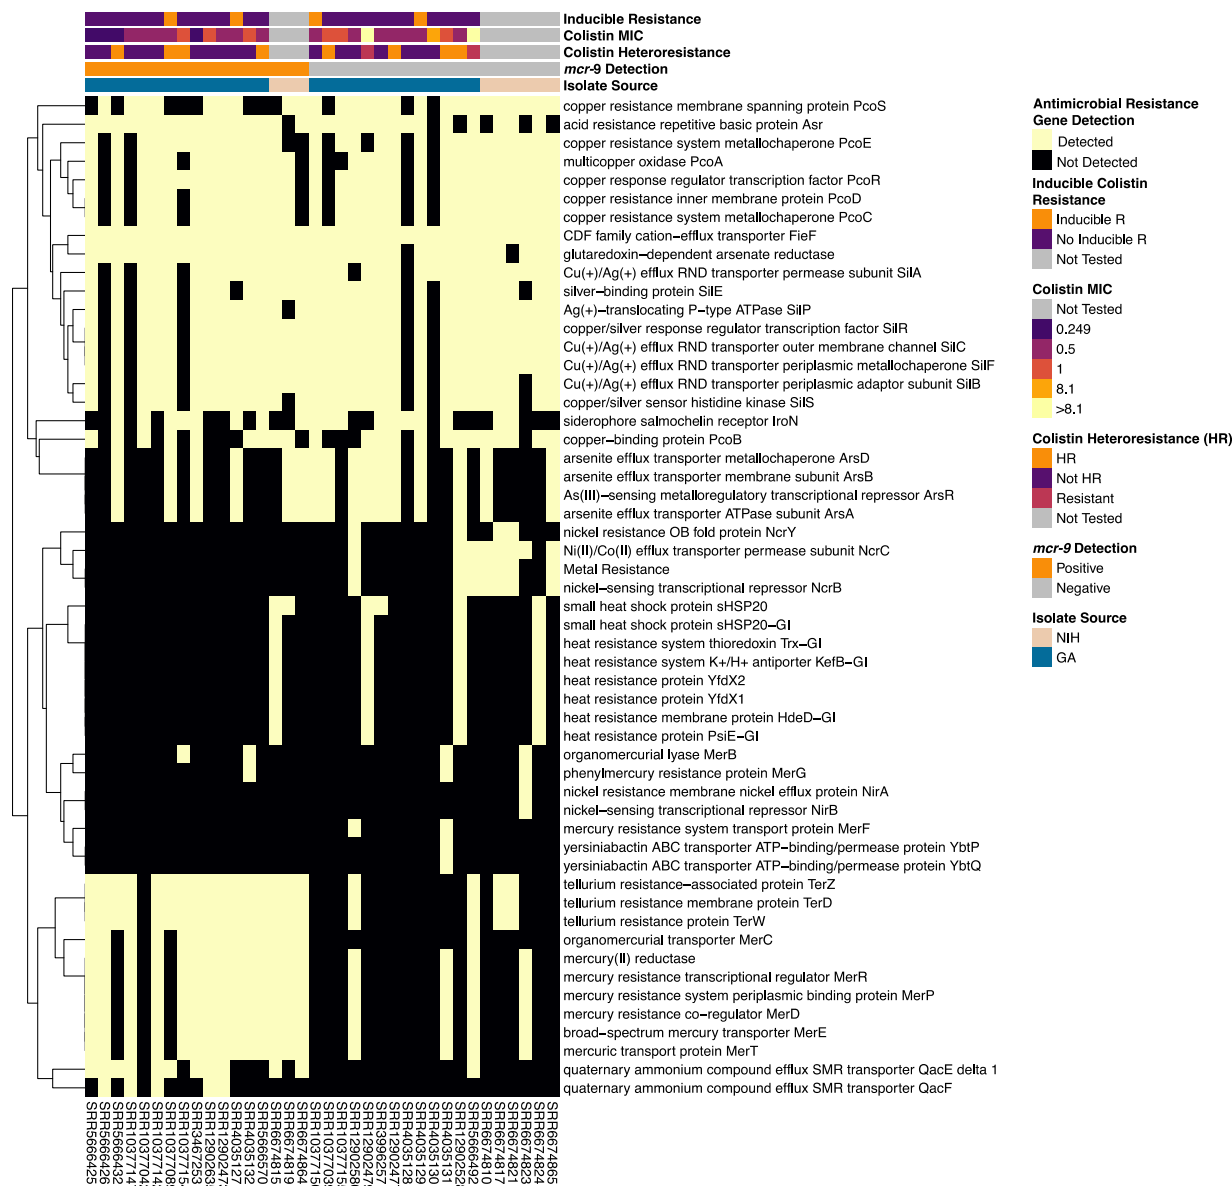

689

690

691 **Supplementary Figure 3 Legend: Genomes were annotated using Prodigal and**

692 virulence gene content was assessed using AMRFinder. Virulence gene

693 presence/absence heatmaps were created using the package pheatmap on R version  
694 4.0.2 (Vienna, Austria) and the RStudio interface version 1.3.1073 (Boston, MA, USA).  
695
